# Supplementary material for: Dating Phylogenies with Hybrid Local Molecular Clocks
Source: PubMed Central journal article supplement (PMC1964517; doi:10.1371/journal.pone.0000879), 2007-09-12

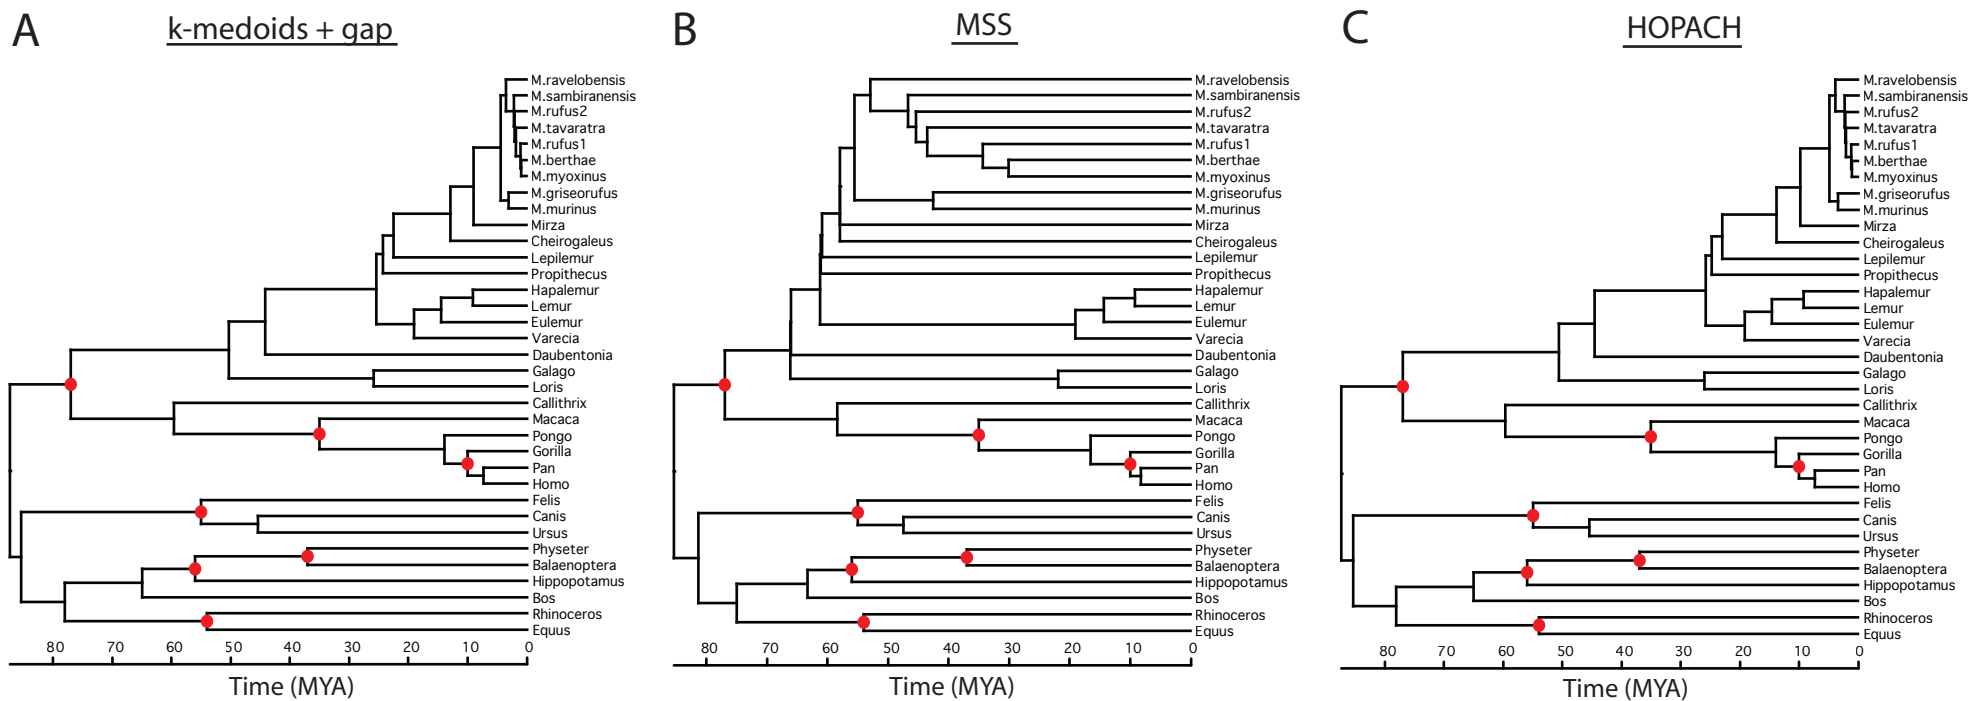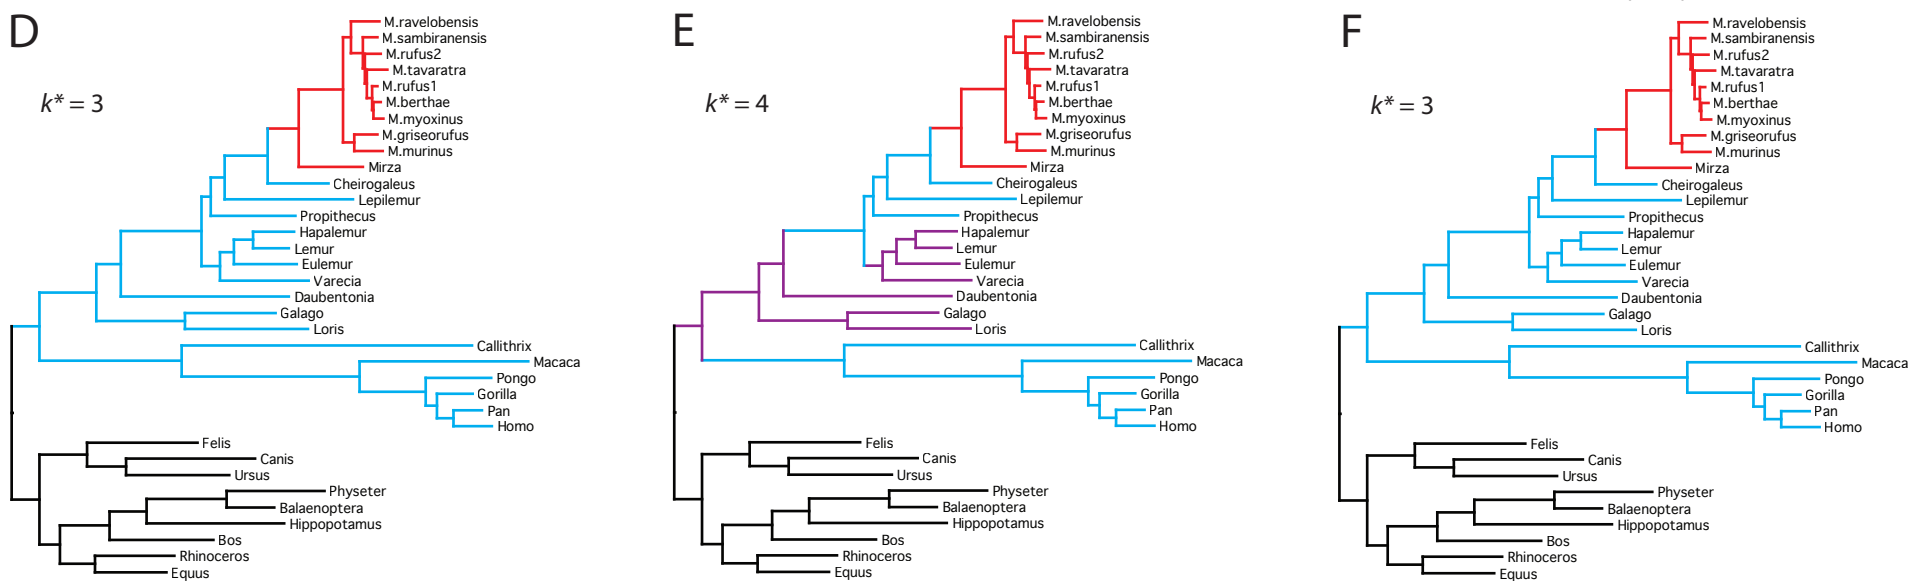

Supplement: pone.0000879.s001.pdf [file pone.0000879.s001.pdf]
