# Supplementary material for: Dating Phylogenies with Hybrid Local Molecular Clocks
Source: PubMed Central journal article supplement (PMC1964517; doi:10.1371/journal.pone.0000879), 2007-09-12
Supplement: pone.0000879.s002.pdf [file pone.0000879.s002.pdf]

k-medoids + gap

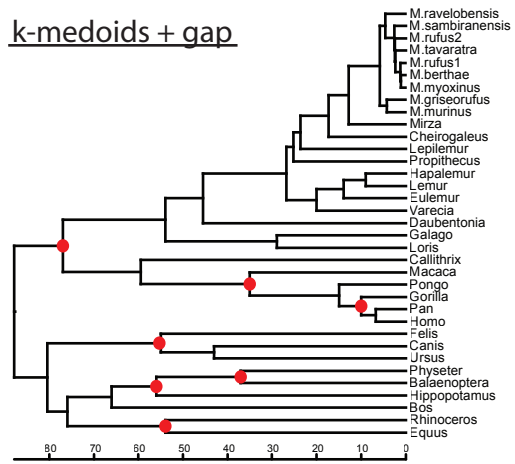

$k^* = 3$

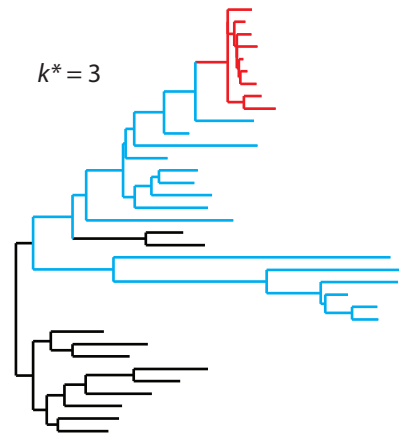

$k^* = 3$

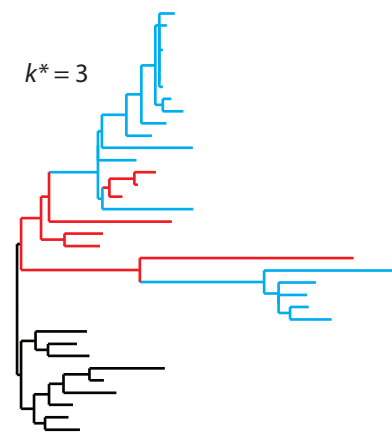

$k^* = 3$

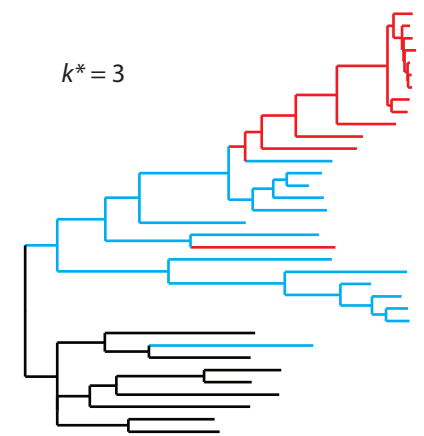

MSS

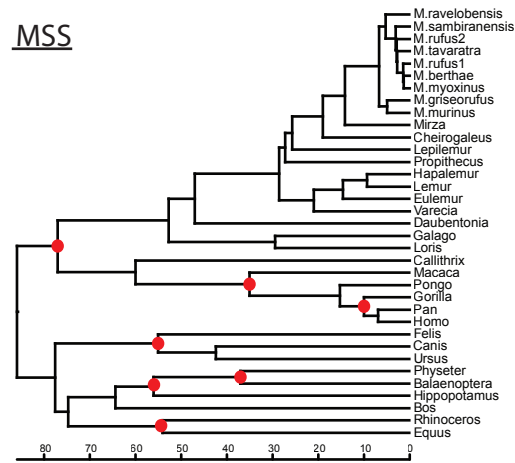

$k^* = 6$

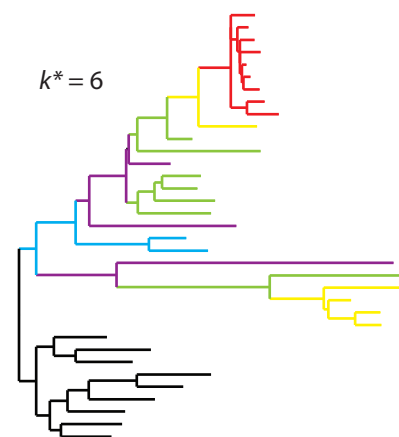

$k^* = 2$

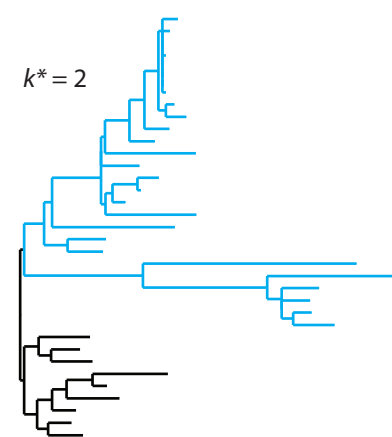

$k^* = 4$

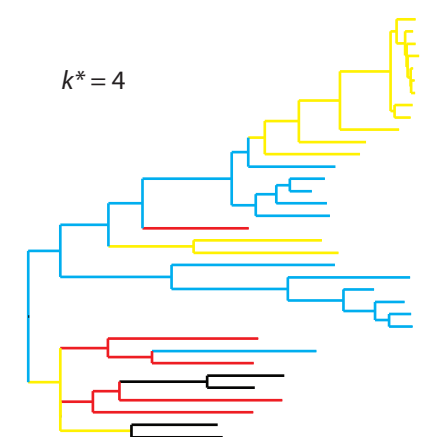

HOPACH

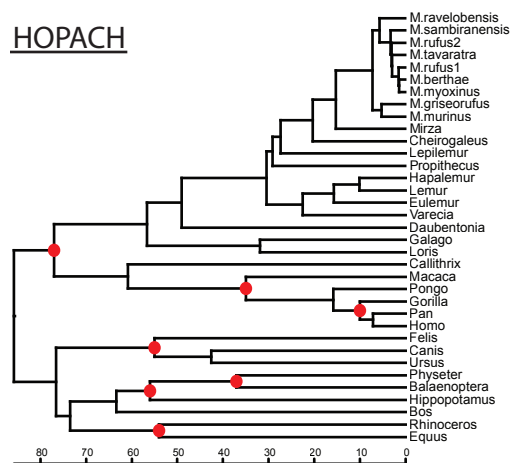

$k^* = 4$

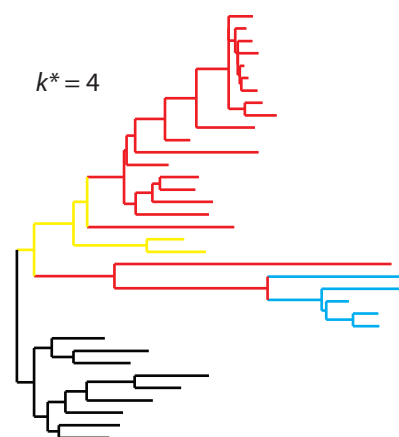

$k^* = 8$

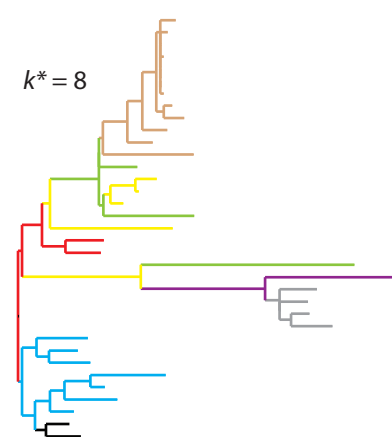

$k^* = 4$

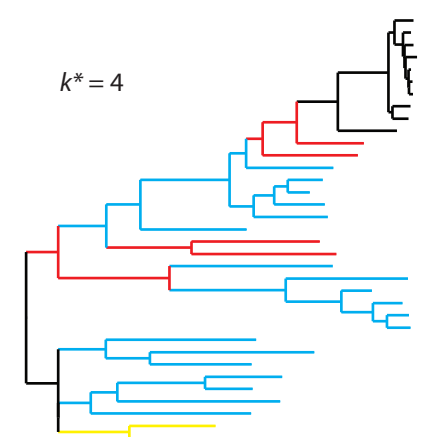

Time (MYA)

Codon position 1

Codon position 2

Codon position 3
